# Supplementary material
Source: publisher site journal article supplement (https://www.dovepress.com/get_supplementary_file.php?f=464456.docx)
Supplement: Supplementary file 1 [file get_supplementary_file.php]

Appendix 1：The details of the search strategies

| **Database** | **Search strategy** |
| --- | --- |
| Web of Science | 1: (TS= (Pharmacy Administration)) AND TS=(Clinical)  2: (TS= (Pharmacy Administration)) AND TS=(Hospital)  3: (TS= (Pharmacy Administration)) AND TS=(Institutional)  4: (TS= (Pharmacy Management)) AND TS=(Clinical)  5: (TS= (Pharmacy Management)) AND TS=(Hospital)  6: (TS= (Pharmacy Management)) AND TS=(Institutional)  7: (TS= (Pharmaceutical Administration)) AND TS=(Clinical)  8: (TS= (Pharmaceutical Administration)) AND TS=(Hospital)  9: (TS= (Pharmaceutical Administration)) AND TS=(Institutional)  10: (TS= (Pharmaceutical Management)) AND TS=(Clinical)  11: (TS= (Pharmaceutical Management)) AND TS=(Hospital)  12: (TS= (Pharmaceutical Management)) AND TS=(Institutional)  13: (TS= (Medication Management)) AND TS=(Clinical)  14: (TS= (Medication Management)) AND TS=(Hospital)  15: (TS= (Medication Management)) AND TS=(Institutional)  16: (TS= (Medication Administration)) AND TS=(Clinical)  17: (TS= (Medication Administration)) AND TS=(Hospital)  18: (TS= (Medication Administration)) AND TS=(Institutional)  19: #3 OR #2 OR #1 20: #4 OR #5 OR #6 21: #7 OR #8 OR #9 22: #10 OR #11 OR #12 23: #13 OR #14 OR #15  24: #16 OR #17 OR #18 25: #19 OR #20 OR #21 OR #22 OR #23 OR #24 |
